# Supplementary material
Source: MDPI journal article supplement (https://www.mdpi.com/2075-5309/13/9/2205)
Supplement: s1 [file s1]

## Supplementary Material

**Table S1. Fuzzy correlation matrix of indicators**

|     | S1   | S2   | S3   | S4   | S5   | S6   | S7   | S8   | S9   | S10  | S11  | S12  | S13  | S14  | S15  | S16  | S17  | S18  |
|-----|------|------|------|------|------|------|------|------|------|------|------|------|------|------|------|------|------|------|
| S1  | 0    | 0.52 | 0.53 | 0.21 | 0.54 | 0.43 | 0.21 | 0.51 | 0.11 | 0.53 | 0.12 | 0.61 | 0.6  | 0.17 | 0.21 | 0.22 | 0.64 | 0.55 |
| S2  | 0.50 | 0    | 0.22 | 0.13 | 0.22 | 0.22 | 0.14 | 0.27 | 0.23 | 0.22 | 0.21 | 0.27 | 0.23 | 0.61 | 0.41 | 0.2  | 0.9  | 0.17 |
| S3  | 0.61 | 0.94 | 0    | 0.61 | 0.22 | 0.22 | 0.51 | 0.32 | 0.53 | 0.34 | 0.51 | 0.22 | 0.47 | 0.58 | 0.49 | 0.51 | 0.24 | 0.23 |
| S4  | 0.92 | 0.21 | 0.57 | 0    | 0.5  | 0.51 | 0.28 | 0.29 | 0.1  | 0.19 | 0.64 | 0.48 | 0.61 | 0.25 | 0.21 | 0.22 | 0.15 | 0.35 |
| S5  | 0.1  | 0.51 | 0.54 | 0.1  | 0    | 0.47 | 0.11 | 0.22 | 0.2  | 0.21 | 0.13 | 0.52 | 0.42 | 0.23 | 0.18 | 0.24 | 0.51 | 0.45 |
| S6  | 0.12 | 0.26 | 0.25 | 0.23 | 0.11 | 0    | 0.88 | 0.89 | 0.22 | 0.2  | 0.29 | 0.67 | 0.68 | 0.21 | 0.35 | 0.47 | 0.3  | 0.51 |
| S7  | 0.13 | 0.22 | 0.24 | 0.12 | 0.43 | 0.9  | 0    | 0.93 | 0.22 | 0.2  | 0.3  | 0.4  | 0.5  | 0.4  | 0.4  | 0.6  | 0.31 | 0.47 |
| S8  | 0.17 | 0.23 | 0.21 | 0.21 | 0.5  | 0.45 | 0.91 | 0    | 0.24 | 0.45 | 0.45 | 0.22 | 0.83 | 0.81 | 0.56 | 0.44 | 0.43 | 0.27 |
| S9  | 0.21 | 0.37 | 0.49 | 0.56 | 0.52 | 0.41 | 0.13 | 0.97 | 0    | 0.33 | 0.55 | 0.54 | 0.41 | 0.32 | 0.21 | 0.53 | 0.47 | 0.86 |
| S10 | 0.56 | 0.42 | 0.96 | 0.52 | 0.11 | 0.17 | 0.21 | 0.13 | 0.13 | 0    | 0.61 | 0.62 | 0.22 | 0.52 | 0.53 | 0.51 | 0.12 | 0.41 |
| S11 | 0.21 | 0.13 | 0.34 | 0.6  | 0.23 | 0.14 | 0.25 | 0.27 | 0.56 | 0.18 | 0    | 0.19 | 0.22 | 0.41 | 0.13 | 0.43 | 0.51 | 0.24 |
| S12 | 0.14 | 0.2  | 0.21 | 0.67 | 0.12 | 0.9  | 0.88 | 0.15 | 0.22 | 0.22 | 0.51 | 0    | 0.53 | 0.24 | 0.41 | 0.4  | 0.66 | 0.67 |
| S13 | 0.56 | 0.32 | 0.92 | 0.41 | 0.22 | 0.52 | 0.51 | 0.21 | 0.22 | 0.12 | 0.22 | 0.13 | 0    | 0.14 | 0.65 | 0.72 | 0.52 | 0.21 |
| S14 | 0.89 | 0.54 | 0.91 | 0.56 | 0.3  | 0.21 | 0.13 | 0.11 | 0.17 | 0.53 | 0.12 | 0.56 | 0.94 | 0    | 0.22 | 0.43 | 0.27 | 0.11 |
| S15 | 0.51 | 0.14 | 0.88 | 0.54 | 0.11 | 0.12 | 0.23 | 0.42 | 0.23 | 0.67 | 0.22 | 0.65 | 0.41 | 0.89 | 0    | 0.41 | 0.13 | 0.15 |
| S16 | 0.21 | 0.11 | 0.22 | 0.51 | 0.89 | 0.11 | 0.12 | 0.23 | 0.12 | 0.12 | 0.65 | 0.54 | 0.24 | 0.54 | 0.17 | 0    | 0.86 | 0.24 |
| S17 | 0.12 | 0.23 | 0.11 | 0.12 | 0.95 | 0.12 | 0.14 | 0.53 | 0.23 | 0.65 | 0.78 | 0.41 | 0.2  | 0.23 | 0.41 | 0.84 | 0    | 0.54 |
| S18 | 0.11 | 0.12 | 0.17 | 0.56 | 0.92 | 0.41 | 0.22 | 0.13 | 0.17 | 0.52 | 0.56 | 0.31 | 0.12 | 0.53 | 0.24 | 0.41 | 0.91 | 0    |

**Table S2. The reachable matrix**

|     | S1 | S2 | S3 | S4 | S5 | S6 | S7 | S8 | S9 | S10 | S11 | S12 | S13 | S14 | S15 | S16 | S17 | S18 |
|-----|----|----|----|----|----|----|----|----|----|-----|-----|-----|-----|-----|-----|-----|-----|-----|
| S1  | 1  | 0  | 0  | 0  | 0  | 0  | 0  | 0  | 0  | 0   | 0   | 0   | 0   | 0   | 0   | 0   | 0   | 0   |
| S2  | 1  | 1  | 1  | 0  | 1  | 0  | 0  | 0  | 0  | 1   | 1   | 0   | 1   | 1   | 1   | 1   | 1   | 0   |
| S3  | 1  | 1  | 1  | 0  | 1  | 0  | 0  | 0  | 0  | 1   | 1   | 0   | 1   | 1   | 1   | 1   | 1   | 0   |
| S4  | 1  | 0  | 0  | 1  | 0  | 0  | 0  | 0  | 0  | 0   | 0   | 0   | 0   | 0   | 0   | 0   | 0   | 0   |
| S5  | 0  | 0  | 0  | 0  | 1  | 0  | 0  | 0  | 0  | 0   | 0   | 0   | 0   | 0   | 0   | 0   | 0   | 0   |
| S6  | 0  | 0  | 0  | 0  | 0  | 1  | 1  | 1  | 0  | 0   | 0   | 0   | 1   | 1   | 1   | 1   | 1   | 0   |
| S7  | 0  | 0  | 0  | 0  | 0  | 1  | 1  | 1  | 0  | 0   | 0   | 0   | 1   | 1   | 1   | 1   | 1   | 0   |
| S8  | 1  | 0  | 1  | 0  | 1  | 1  | 1  | 1  | 0  | 1   | 1   | 0   | 1   | 1   | 1   | 1   | 1   | 0   |
| S9  | 1  | 0  | 1  | 0  | 1  | 1  | 1  | 1  | 1  | 1   | 1   | 0   | 1   | 1   | 1   | 1   | 1   | 1   |
| S10 | 1  | 1  | 1  | 0  | 1  | 0  | 0  | 0  | 0  | 1   | 1   | 0   | 1   | 1   | 1   | 1   | 1   | 0   |
| S11 | 1  | 0  | 1  | 1  | 1  | 1  | 1  | 1  | 1  | 1   | 1   | 0   | 1   | 1   | 1   | 1   | 1   | 1   |
| S12 | 1  | 0  | 0  | 1  | 1  | 1  | 1  | 1  | 0  | 1   | 1   | 1   | 1   | 1   | 1   | 1   | 1   | 1   |
| S13 | 1  | 1  | 1  | 0  | 1  | 0  | 0  | 0  | 0  | 1   | 1   | 0   | 1   | 1   | 1   | 1   | 1   | 1   |
| S14 | 1  | 1  | 1  | 0  | 1  | 0  | 0  | 0  | 0  | 1   | 1   | 0   | 1   | 1   | 1   | 1   | 1   | 1   |
| S15 | 1  | 1  | 1  | 0  | 1  | 0  | 0  | 0  | 0  | 1   | 1   | 0   | 1   | 1   | 1   | 1   | 1   | 1   |
| S16 | 1  | 0  | 1  | 1  | 1  | 1  | 1  | 1  | 1  | 1   | 1   | 0   | 1   | 1   | 1   | 1   | 1   | 1   |
| S17 | 1  | 1  | 1  | 1  | 1  | 1  | 1  | 1  | 1  | 1   | 1   | 0   | 1   | 1   | 1   | 1   | 1   | 1   |
| S18 | 1  | 1  | 1  | 1  | 1  | 1  | 1  | 1  | 1  | 1   | 1   | 0   | 1   | 1   | 1   | 1   | 1   | 1   |
